# Supplementary material for: De Novo Assembly and Phasing of Dikaryotic Genomes from Two Isolates of Puccinia coronata f. sp. avenae, the Causal Agent of Oat Crown Rust
Source: PubMed Central journal article supplement (PMC5821079; doi:10.1128/mbio.01650-17), 2018-02-20

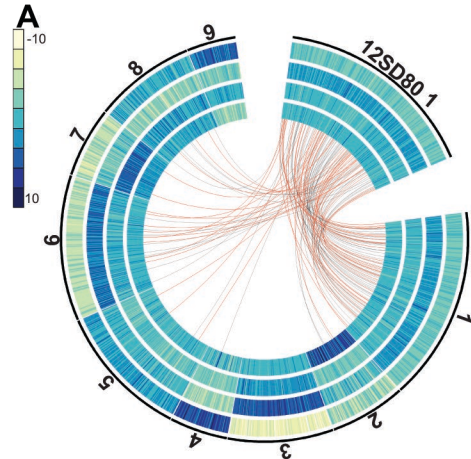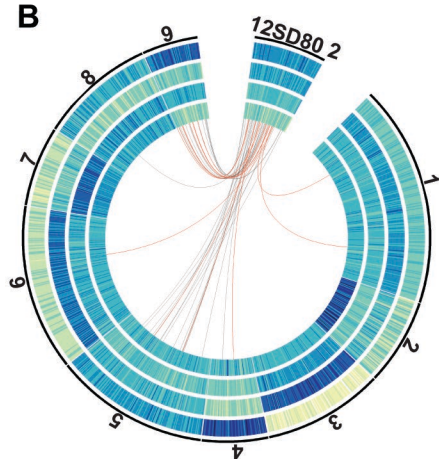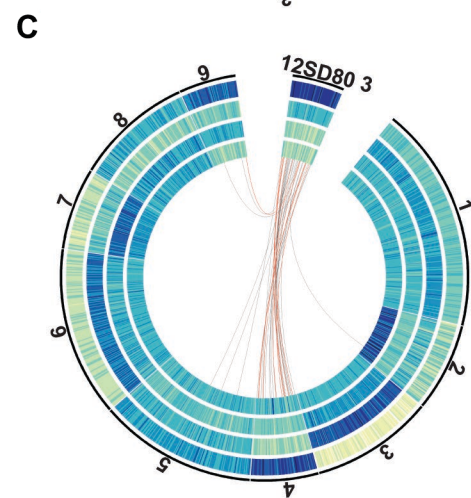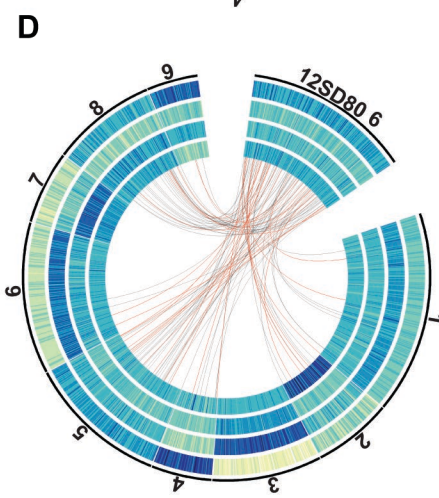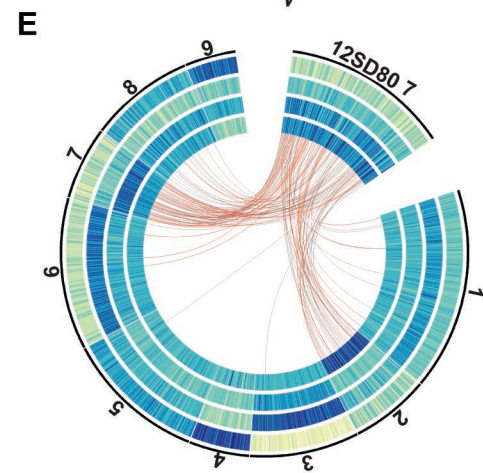

Supplement: mbo001183748sf5.pdf [file mbo001183748sf5.pdf]
